# Supplementary material
Source: ML conference proceedings conference paper supplement (https://proceedings.mlr.press/v139/shen21b.html)
Supplement: Supplementary file 1 [file shen21b-supp.pdf]

## A. Detailed Choices of Reserved Constants

The absolute constants  $c_0, c_1$  and  $c_2$  are specified in Lemma 24, and  $c_3$  and  $c_4$  are specified in Lemma 25.  $c_5$  and  $c_6$  are clarified in Section 3.1.1. The definition of  $c_7$  and  $c_8$  can be found in Lemma 26 and Lemma 27 respectively. The absolute constant  $C_1$  acts as an upper bound of all  $b_k$ 's, and by our choice in Section 3.1.1,  $C_1 = \bar{c}/16$ . The absolute constant  $C_2$  is defined in Lemma 3. Other absolute constants, such as  $C_3, C_4$  are not quite crucial to our analysis or algorithmic design. Therefore, we do not track their definitions. The subscript variants of  $K$ , e.g.  $K_1$  and  $K_2$ , are also absolute constants but their values may change from appearance to appearance. We remark that the value of all these constants does not depend on the underlying distribution  $D$  chosen by the adversary, but rather depends on the knowledge that  $D$  is a member of the family of isotropic log-concave distributions.

## B. Omitted Proofs in Section 2

We will frequently use the well-known Chernoff bound in our analysis. For convenience, we record it below.

**Lemma 17** (Chernoff bound). *Let  $Z_1, Z_2, \dots, Z_n$  be  $n$  independent random variables that take value in  $\{0, 1\}$ . Let  $Z = \sum_{i=1}^n Z_i$ . For each  $Z_i$ , suppose that  $\Pr(Z_i = 1) \leq \eta$ . Then for any  $\alpha \in [0, 1]$*

$$\Pr(Z \geq (1 + \alpha)\eta n) \leq e^{-\frac{\alpha^2 \eta n}{3}}.$$

When  $\Pr(Z_i = 1) \geq \eta$ , for any  $\alpha \in [0, 1]$

$$\Pr(Z \leq (1 - \alpha)\eta n) \leq e^{-\frac{\alpha^2 \eta n}{2}}.$$

### B.1. Proof of Lemma 4

*Proof.* We note that  $(\rho^+ - \rho^-)^2 \leq 4(\rho^+)^2$ . In addition, this inequality is almost tight up to a constant factor since  $\rho^-$  can be as small as 0. To see this, observe that  $u \in W$  and  $x$  is such that  $|u \cdot x| \leq b$ .

Thus, it remains to upper bound  $\rho^+$ . Due to localized sampling, for any  $w \in W$  we have

$$|w \cdot x| \leq |(w - u) \cdot x| + |u \cdot x| \leq \|w - u\|_2 \cdot \|x\|_2 + b \leq r \cdot c_7 \sqrt{d} \log \frac{1}{b\delta} + b, \quad (5)$$

where the first step follows from the triangle inequality, the second step uses Cauchy-Schwarz inequality and the fact  $x \sim D_{u,b}$ , and the last step applies Lemma 26. The lemma follows by noting that  $r = \Theta(b)$ .  $\square$

### B.2. Proof of Lemma 7

*Proof.* For any unit vector  $v$ , observe that  $w := rv + u$  is such that  $\|w - u\|_2 \leq r$ . Hence,

$$\begin{aligned} \mathbb{E}[(v \cdot x)^2] &= \frac{1}{r^2} \mathbb{E}[(r \cdot v \cdot x)^2] \\ &\leq \frac{2}{r^2} \mathbb{E}[(r \cdot v + u) \cdot x]^2 + \frac{2}{r^2} \mathbb{E}[(u \cdot x)^2] \\ &\leq \frac{2}{r^2} \cdot C_2(b^2 + r^2) + \frac{2}{r^2} \cdot b^2 \\ &\leq \frac{4C_2(b^2 + r^2)}{r^2}, \end{aligned}$$

where in the second step we use the basic inequality  $a_1^2 \leq 2(a_1 - a_2)^2 + 2a_2^2$ , and in the third step we apply Lemma 3. This proves the first desired inequality.

Next, by Lemma 26 we have with probability  $1 - \delta$ ,  $\|x\|_2 \leq c_7 \sqrt{d} \log \frac{1}{b\delta}$ . Then for any unit vector  $v$ , we have

$$(v \cdot x)^2 \leq \|v\|_2^2 \cdot \|x\|_2^2 \leq c_7^2 \cdot d \log^2 \frac{1}{b\delta},$$

which implies the second desired inequality.  $\square$

### B.3. Proof of Proposition 8

*Proof.* In Lemma 6, we set  $\alpha = 1$ ,  $M_i = x_i x_i^\top$  where  $x_i$  is the  $i$ -th instance in the set  $T_C$ . Lemma 7 implies that  $\mu_{\max} \leq \frac{4C_2(b^2+r^2)}{r^2} |T_C| \leq K \cdot |T_C|$  for some constant  $K > 0$  since  $r = \Theta(b)$ , and with probability  $1 - \delta$ ,  $\Lambda \leq K_1 \cdot d \log^2 \frac{|T_C|}{b\delta}$  by union bound. By conditioning on these events and putting all pieces together, Lemma 6 asserts that with probability

$$1 - d \cdot \left(\frac{\epsilon}{4}\right)^{\frac{K}{K_1} \cdot \frac{|T_C|}{d \log^2 \frac{|T_C|}{b\delta}}}, \quad \lambda_{\max} \left( \sum_{x \in S} x x^\top \right) \leq 2K \cdot |T_C|. \quad (6)$$

Equivalently, the above holds with probability  $1 - \delta$  as long as  $|T_C| \geq K_2 d \log^2 \frac{|T_C|}{b\delta} \cdot \log \frac{d}{\delta}$  for some constant  $K_2 > 0$ .  $\square$

### B.4. Proof of Lemma 9

*Proof.* By Lemma 27

$$\Pr_{x \sim D}(x \in X) \geq c_8 b.$$

This implies that

$$\begin{aligned} & \Pr_{x \sim \text{EX}_\eta^x(D, w^*)}(x \in X_{u,b} \text{ and } x \text{ is clean}) \\ &= \Pr_{x \sim \text{EX}_\eta^x(D, w^*)}(x \in X_{u,b} \mid x \text{ is clean}) \cdot \Pr_{x \sim \text{EX}_\eta^x(D, w^*)}(x \text{ is clean}) \geq c_8 b(1 - \eta). \end{aligned}$$

We want to ensure that by drawing  $N$  instances from  $\text{EX}_\eta^x(D, w^*)$ , with probability at least  $1 - \delta$ ,  $n$  out of them fall into the band  $X_{u,b}$ . We apply the second inequality of Lemma 17 by letting  $Z_i = \mathbf{1}_{\{x_i \in X_{u,b} \text{ and } x_i \text{ is clean}\}}$  and  $\alpha = 1/2$ , and obtain

$$\Pr \left( |T_C| \leq \frac{c_8 b(1 - \eta)}{2} N \right) \leq \exp \left( -\frac{c_8 b(1 - \eta) N}{8} \right),$$

where the probability is taken over the event that we make a number of  $N$  calls to  $\text{EX}_\eta^x(D, w^*)$ . Thus, when  $N \geq \frac{8}{c_8 b(1 - \eta)} \left( n + \ln \frac{1}{\delta} \right)$ , we are guaranteed that at least  $n$  samples from  $\text{EX}_\eta^x(D, w^*)$  fall into the band  $X_{u,b}$  with probability  $1 - \delta$ . The lemma follows by observing  $\eta < \frac{1}{2}$ .  $\square$

### B.5. Proof of Lemma 10

This is a simplified version of Lemma 30 of Shen & Zhang (2021).

*Proof.* We calculate the noise rate within the band  $X_k := \{x : |w_{k-1} \cdot x| \leq b_k\}$  by Lemma 18:

$$\Pr_{x \sim \text{EX}_\eta^x(D, w^*)}(x \text{ is dirty} \mid x \in X_{u,b}) \leq \frac{2\eta}{c_8 b} \leq \frac{2\eta}{c_8 \epsilon} \leq \frac{2c_5}{c_8} \leq \frac{1}{8},$$

where the second inequality applies the setting  $b \geq \epsilon$ , the third inequality is due to the condition  $\eta \leq c_5 \epsilon$ , and the last inequality is due to the condition that  $c_5$  is assumed to be a sufficiently small constant. Now we apply the first inequality of Lemma 17 by specifying  $Z_i = \mathbf{1}_{\{x_i \text{ is dirty}\}}$ ,  $\alpha = 1$  therein, which gives

$$\Pr \left( |T_D| \geq \frac{1}{4} |T| \right) \leq \exp \left( -\frac{|T|}{24} \right),$$

where the probability is taken over the draw of  $T$ . The lemma follows by setting the right-hand side to  $\delta$  and noting that  $|T_C| = |T| - |T_D|$ .  $\square$

**Lemma 18.** Assume  $\eta < \frac{1}{2}$ . We have

$$\Pr_{x \sim \text{EX}_\eta^x(D, w^*)}(x \text{ is dirty} \mid x \in X_{u,b}) \leq \frac{2\eta}{c_8 b}$$

where  $c_8$  was defined in Lemma 27.

*Proof.* For an instance  $x$ , we use  $\text{tag}_x = 1$  to denote that  $x$  is drawn from  $D$ , and use  $\text{tag}_x = -1$  to denote that  $x$  is adversarially generated.

We first calculate the probability that an instance returned by  $\text{EX}_\eta^x(D, w^*)$  falls into the band  $X_{u,b}$  as follows:

$$\begin{aligned}
 & \Pr_{x \sim \text{EX}_\eta^x(D, w^*)} (x \in X_{u,b}) \\
 &= \Pr_{x \sim \text{EX}_\eta^x(D, w^*)} (x \in X_{u,b} \text{ and } \text{tag}_x = 1) + \Pr_{x \sim \text{EX}_\eta^x(D, w^*)} (x \in X_{u,b} \text{ and } \text{tag}_x = -1) \\
 &\geq \Pr_{x \sim \text{EX}_\eta^x(D, w^*)} (x \in X_{u,b} \text{ and } \text{tag}_x = 1) \\
 &= \Pr_{x \sim \text{EX}_\eta^x(D, w^*)} (x \in X_{u,b} \mid \text{tag}_x = 1) \cdot \Pr_{x \sim \text{EX}_\eta^x(D, w^*)} (\text{tag}_x = 1) \\
 &= \Pr_{x \sim D} (x \in X_{u,b}) \cdot \Pr_{x \sim \text{EX}_\eta^x(D, w^*)} (\text{tag}_x = 1) \\
 &\stackrel{\zeta}{\geq} c_8 b \cdot (1 - \eta) \\
 &\geq \frac{1}{2} c_8 b,
 \end{aligned}$$

where in the inequality  $\zeta$  we applied Part 1 of Lemma 27. It is thus easy to see that

$$\Pr_{x \sim \text{EX}_\eta^x(D, w^*)} (\text{tag}_x = -1 \mid x \in X_{u,b}) \leq \frac{\Pr_{x \sim \text{EX}_\eta^x(D, w^*)} (\text{tag}_x = -1)}{\Pr_{x \sim \text{EX}_\eta^x(D, w^*)} (x \in X_{u,b})} \leq \frac{2\eta}{c_8 b},$$

which is the desired result.  $\square$

## B.6. Rademacher analysis leads to suboptimal sample complexity for quadratic functions

To see why a general Rademacher analysis may not suffice, we can, for example, think of the quadratic function  $(w \cdot x)^2$  as a composition of the functions  $\phi(f) = f^2$  and  $f_w(x) = w \cdot x$ . Recall that we showed with high probability that  $|w \cdot x| \leq O(b\sqrt{d})$  (omitting logarithmic factors for convenience). Now, the gradient of  $\phi(\cdot)$  is  $2w \cdot x$  which is upper bounded by  $O(b\sqrt{d})$  and the function value of  $\phi(\cdot)$  is upper bounded by  $O(b^2 d)$ . For the Rademacher complexity  $\mathcal{R}_{\mathcal{F}}$  of the class of linear functions  $\mathcal{F} := \{f_w(x) = w \cdot x : w \in W\}$  on  $T_C = \{x_1, \dots, x_n\}$ , let  $V = \{v \in \mathbb{R}^d : \|v\|_2 \leq 1\}$  and note that for any  $w \in W$ ,  $w = u + rv$ . We have by definition

$$\begin{aligned}
 \mathcal{R}_{\mathcal{F}} &= \frac{1}{n} \mathbb{E} \sup_{w \in W} \sum_{i=1}^n \sigma_i (w \cdot x_i) \\
 &= \frac{1}{n} \mathbb{E} \sup_{w \in W} w \cdot \sum_{i=1}^n \sigma_i x_i \\
 &\leq \frac{r}{n} \mathbb{E} \sup_{v \in V} v \cdot \sum_{i=1}^n \sigma_i x_i + \frac{1}{n} \mathbb{E} u \cdot \sum_{i=1}^n \sigma_i x_i \\
 &\leq \frac{r}{n} \mathbb{E} \left\| \sum_{i=1}^n \sigma_i x_i \right\|_2 \\
 &\leq \frac{r}{n} \cdot \sqrt{n} \max_{1 \leq i \leq n} \|x_i\|_2,
 \end{aligned}$$

where the expectation is taken over the i.i.d. Rademacher variables  $\sigma_1, \dots, \sigma_n$ . By Lemma 26,  $\mathcal{R}_{\mathcal{F}} \leq \frac{r}{\sqrt{n}} \sqrt{d}$  with high probability. By the contraction lemma, the Rademacher complexity of the class of quadratic functions is  $O(\frac{brd}{\sqrt{n}})$ , and thus uniform concentration through Rademacher analysis requires  $O(d^2)$  samples.

Similarly, a straightforward application of local Rademacher analysis (Bartlett et al., 2005) may not suffice as well. However, our discussion here does not rule out the possibility that a more sophisticated exploration of these techniques would lead to the desired sample complexity bound; we leave it as an open problem.

### C. Omitted Proofs in Section 3

We present a full proof of the results in Section 3. Observe that the malicious noise is a special case of the nasty noise; hence this section can also be thought of as providing a complete proof for the results in Section 2.

To improve the transparency, we collect useful notations in Table 1.

Table 1. Summary of useful notations associated with the working set  $T$  at each phase  $k$  for learning with nasty noise.

|             |                                                                                                  |
|-------------|--------------------------------------------------------------------------------------------------|
| $\hat{A}'$  | labeled clean instance set obtained by drawing $N$ instances from $D$ and labeling them by $w^*$ |
| $A'$        | (clean) instance set obtained by hiding all the labels in $\hat{A}'$                             |
| $\hat{A}$   | labeled corrupted instance set obtained by replacing $\eta N$ samples in $\hat{A}'$              |
| $A$         | (corrupted) instance set obtained by hiding all the labels in $\hat{A}$                          |
| $A_C$       | set of clean instances in $A$                                                                    |
| $A_D$       | set of dirty instances in $A$ , i.e. $A \setminus A_C$                                           |
| $A_E$       | set of clean instances erased from $A'$ by the adversary                                         |
| $T$         | set of instances in $A$ that satisfy $ w_{k-1} \cdot x  \leq b_k$                                |
| $T_C$       | set of clean instances in $T$                                                                    |
| $T_D$       | set of dirty instances in $T$ , i.e. $T \setminus T_C$                                           |
| $\hat{T}_C$ | unrevealed labeled set of $T_C$                                                                  |
| $\hat{T}_E$ | unrevealed labeled set of $T_E$                                                                  |

#### C.1. Proof of Lemma 11

*Proof.* Since  $\eta \leq c_5 \epsilon$  and  $b \geq \epsilon$ , we have  $\eta \leq c_5 b \leq \frac{1}{2} c_8 \xi b$  where the second inequality follows from the fact that  $c_5$  is a small constant and  $\xi \geq \Omega(1)$ . Thus  $|A_D| = \eta N \leq \frac{1}{2} c_8 \xi b N$  and  $|A_C| = N - |A_D| \geq (1 - \frac{1}{2} c_8 \xi b) N$ .  $\square$

#### C.2. Proof of Lemma 12

*Proof.* We first show that the following two events hold simultaneously with probability  $1 - \frac{\delta_k}{24}$ :

$$E_1 : |A_C| \geq \left(1 - \frac{1}{2} c_8 \xi b\right) N \text{ and } |A_D| \leq \frac{1}{2} c_8 \xi b N,$$

$$E_2 : |T_C| \geq \frac{1}{2} c_8 (1 - \xi) b N \text{ and } |T_E| \leq \frac{1}{2} c_8 \xi b N.$$

Observe that  $E_1$  holds with certainty due to Lemma 11.

To see why  $E_2$  holds with high probability, we recall that Part 1 of Lemma 27 shows that  $\Pr_{x \sim D}(x \in X_{u,b}) \geq c_8 b$ . For each  $x_i \in A_C \cup A_E$ , define  $Z_i = \mathbf{1}_{\{x_i \in X_{u,b}\}}$ . Since  $A_C \cup A_E$  are i.i.d. draws from  $D$ , by applying the second part of Lemma 17 with  $\alpha = 1/2$ , we have

$$\Pr \left( \sum_{i=1}^N Z_i \leq \frac{1}{2} c_8 b N \right) \leq \exp \left( -\frac{c_8 b N}{8} \right).$$

This shows that

$$|T_C| + |T_E| \geq \frac{1}{2} c_8 b N$$

with probability  $1 - \delta$  provided that  $N \geq \frac{8}{c_8 b} \ln \frac{1}{\delta}$ . On the other side, we have  $|T_E| \leq |A_E| = |A_D| \leq \frac{1}{2} c_8 \xi b N$ . Thus it follows that  $|T_C| \geq \frac{1}{2} c_8 (1 - \xi) b N$ .

For Part 1, we have

$$\frac{|T_C|}{|T_D|} \geq \frac{1 - \xi}{\xi}, \quad (7)$$

where the inequality follows from  $E_2$  and the fact  $|T_D| = |T_E|$ . Therefore,

$$\frac{|T_D|}{|T|} = \frac{1}{1 + |T_C|/|T_D|} \leq \xi. \quad (8)$$

Part 2 of the lemma simply follows  $E_2$ .  $\square$

### C.3. Proof of Proposition 13

*Proof.* Since  $N \geq \frac{d}{b} \cdot \text{polylog}((d, \frac{1}{\delta}))$ , we have by Part 2 that  $|T_C \cup T_E| \geq |T_C| \geq d \cdot \text{polylog}(d, \frac{1}{\delta})$ . Therefore, we can directly apply Proposition 8 by thinking of  $T_C$  therein as  $T_C \cup T_E$  in the current proposition.  $\square$

### C.4. Proof of Theorem 14

*Proof.* We first show the existence of a feasible function  $q(x)$  to Algorithm 2. Consider the specific function  $q : T \rightarrow [0, 1]$  as follows:  $q(x) = 1$  for all  $x \in T_C$  and  $q(x) = 0$  otherwise. We have

$$\frac{1}{|T|} \sum_{x \in T} q(x) = \frac{|T_C|}{|T|} = 1 - \frac{|T_D|}{|T|} \geq 1 - \xi,$$

in view of Part 1 of Lemma 12.

To show Part 3, we note that  $T_C \cup T_E$  are i.i.d. draws from  $D_{u,b}$  and Lemma 12 shows that  $|T_C \cup T_E| \geq \Omega(bN)$ . Therefore, as far as  $N \geq \frac{d}{b} \cdot \text{polylog}(d)$ , Theorem 5 implies that

$$\frac{1}{|T_C| + |T_E|} \sum_{x \in T_C \cup T_E} (w \cdot x)^2 \leq \frac{c}{2} (b^2 + r^2).$$

Since  $(w \cdot x)^2$  is always non-negative, we have

$$\frac{1}{|T_C|} \sum_{x \in T_C} (w \cdot x)^2 \leq \frac{|T_C| + |T_E|}{|T_C|} \cdot \frac{1}{|T_C| + |T_E|} \sum_{x \in T_C \cup T_E} (w \cdot x)^2 \leq \frac{|T_C| + |T_E|}{|T_C|} \cdot \frac{c}{2} (b^2 + r^2).$$

Part 2 of Lemma 12 shows that  $|T_E|/|T_C| \leq \frac{\xi}{1-\xi} \leq 1$  since  $\xi \leq \frac{1}{2}$ . Plugging this upper bound into the above inequality, we obtain

$$\frac{1}{|T_C|} \sum_{x \in T_C} (w \cdot x)^2 \leq c(b^2 + r^2).$$

In a nutshell, our construction of  $q(x)$  ensures the feasibility to all constraints in Algorithm 2. By ellipsoid method we are able to find a feasible solution in polynomial time.  $\square$

### C.5. Proof of Proposition 15

Let  $z = \sqrt{b^2 + r^2}$ . We will in fact prove a stronger result, i.e.,

$$\ell_\tau(w; \hat{T}_C \cup \hat{T}_E) \leq \ell_\tau(w; p \circ \hat{T}) + 2\xi \left( 2 + \sqrt{2K_2} \cdot \frac{z}{\tau} \right) + \sqrt{2K_2\xi} \cdot \frac{z}{\tau}, \quad (9)$$

$$\ell_\tau(w; p \circ \hat{T}) \leq \ell_\tau(w; \hat{T}_C \cup \hat{T}_E) + 2\xi + \sqrt{4K_2\xi} \cdot \frac{z}{\tau}. \quad (10)$$

The claim in the proposition immediately follows since  $z/\tau = \Theta(1)$  and  $\xi$  can be chosen as an arbitrarily small constant.

Let  $\{q(x)\}_{x \in T}$  be the output of Algorithm 2 under the nasty noise model. We extend the domain of  $q(x)$  from  $T$  to  $T \cup T_E$  as follows: for any  $x \in T$ , the value  $q(x)$  remains unchanged; for any  $x \in T_E$ , we set  $q(x) = 0$ . With this in mind, we can, for the purpose of analysis, think of the probability mass function  $\{p(x)\}_{x \in T}$  obtained in Algorithm 1 as over  $T \cup T_E$ , with the value  $p(x)$  stays unchanged for  $x \in T$  and  $p(x) = 0$  for all  $x \in T_E$ .

Now with the *extended* probability mass function  $\{p(x)\}_{x \in T \cup T_E}$ , we can prove the proposition.

*Proof.* Let  $\hat{T}_C$  and  $\hat{T}_E$  be the labeled set of  $T_C$  and  $T_E$  that is correctly annotated by  $w^*$  respectively. For any  $x$  in the instance space, let  $y_x$  be the label that the adversary is committed to. Recall that the empirical distribution  $\{p(x)\}_{x \in T \cup T_E}$  was defined as follows:  $p(x) = \frac{q(x)}{\sum_{x \in T} q(x)}$  for  $x \in T$  and  $p(x) = 0$  for  $x \in T_E$ . The reweighted hinge loss on  $T \cup T_E$  using  $p(x)$  is given by

$$\ell_\tau(w; p \circ \hat{T}) = \frac{1}{|T \cup T_E|} \sum_{x \in T \cup T_E} p(x) \cdot \max \left\{ 0, 1 - \frac{1}{\tau} y_x w \cdot x \right\}. \quad (11)$$

The choice of  $N$  guarantees that Proposition 13, Lemma 12, and Theorem 14 hold simultaneously with probability  $1 - \delta$ . We thus have for all  $w \in W$

$$\frac{1}{|T_C \cup T_E|} \sum_{x \in T_C \cup T_E} (w \cdot x)^2 \leq K_1 z^2, \quad (12)$$

$$\frac{|T_D|}{|T|} \leq \xi, \quad (13)$$

$$\frac{1}{|T|} \sum_{x \in T} q(x) (w \cdot x)^2 \leq K_2 z^2. \quad (14)$$

We now expand  $T$  to  $T \cup T_E$  for the last two inequalities. Indeed, from (13), it is easy to show that

$$\frac{|T_D|}{|T \cup T_E|} \leq \frac{|T_D|}{|T|} \leq \xi. \quad (15)$$

Next, since we defined  $q(x) = 0$  for all  $x \in T_E$ , (14) implies that

$$\frac{1}{|T \cup T_E|} \sum_{x \in T \cup T_E} q(x) (w \cdot x)^2 = \frac{1}{|T \cup T_E|} \sum_{x \in T} q(x) (w \cdot x)^2 \leq \frac{1}{|T|} \sum_{x \in T} q(x) (w \cdot x)^2 \leq K_2 z^2. \quad (16)$$

The remaining steps are exactly same as Proposition 33 of Shen & Zhang (2021) since all the analyses therein rely only on the conditions (12), (15) and (16). For completeness, we present the full proof here.

It follows from Eq. (15) and  $\xi \leq 1/2$  that

$$\frac{|T \cup T_E|}{|T_C \cup T_E|} \leq \frac{|T \cup T_E|}{|T_C|} = \frac{|T \cup T_E|}{|T \cup T_E| - |T_D|} = \frac{1}{1 - |T_D|/|T \cup T_E|} \leq \frac{1}{1 - \xi} \leq 2. \quad (17)$$

In the following, we condition on the event that all these inequalities are satisfied.

**Step 1.** First we upper bound  $\ell_\tau(w; \hat{T}_C \cup \hat{T}_E)$  by  $\ell_\tau(w; p \circ \hat{T})$ .

$$\begin{aligned} |T_C \cup T_E| \cdot \ell_\tau(w; \hat{T}_C \cup \hat{T}_E) &= \sum_{x \in T_C \cup T_E} \ell(w; x, y_x) \\ &= \sum_{x \in T \cup T_E} \left[ q(x) \ell(w; x, y_x) + (\mathbf{1}_{\{x \in T_C \cup T_E\}} - q(x)) \ell(w; x, y_x) \right] \\ &\stackrel{\zeta_1}{\leq} \sum_{x \in T \cup T_E} q(x) \ell(w; x, y_x) + \sum_{x \in T_C \cup T_E} (1 - q(x)) \ell(w; x, y_x) \\ &\stackrel{\zeta_2}{\leq} \sum_{x \in T \cup T_E} q(x) \ell(w; x, y_x) + \sum_{x \in T_C \cup T_E} (1 - q(x)) \left( 1 + \frac{|w \cdot x|}{\tau} \right) \\ &\stackrel{\zeta_3}{\leq} \sum_{x \in T \cup T_E} q(x) \ell(w; x, y_x) + \xi |T \cup T_E| + \frac{1}{\tau} \sum_{x \in T_C \cup T_E} (1 - q(x)) |w \cdot x| \\ &\stackrel{\zeta_4}{\leq} \sum_{x \in T \cup T_E} q(x) \ell(w; x, y_x) + \xi |T \cup T_E| + \frac{1}{\tau} \sqrt{\sum_{x \in T_C \cup T_E} (1 - q(x))^2} \cdot \sqrt{\sum_{x \in T_C \cup T_E} (w \cdot x)^2} \\ &\stackrel{\zeta_5}{\leq} \sum_{x \in T \cup T_E} q(x) \ell(w; x, y_x) + \xi |T \cup T_E| + \frac{1}{\tau} \sqrt{\xi |T \cup T_E|} \cdot \sqrt{K_1 |T_C \cup T_E|} \cdot z, \end{aligned} \quad (18)$$

where  $\zeta_1$  follows from the simple fact that

$$\begin{aligned} \sum_{x \in T \cup T_E} (\mathbf{1}_{\{x \in T_C \cup T_E\}} - q(x)) \ell(w; x, y_x) &= \sum_{x \in T_C \cup T_E} (1 - q(x)) \ell(w; x, y_x) + \sum_{x \in T_D} (-q(x)) \ell(w; x, y_x) \\ &\leq \sum_{x \in T_C \cup T_E} (1 - q(x)) \ell(w; x, y_x), \end{aligned}$$

$\zeta_2$  explores the fact that the hinge loss is always upper bounded by  $1 + \frac{|w \cdot x|}{\tau}$  and that  $1 - q(x) \geq 0$ ,  $\zeta_3$  follows from Part 2 of Theorem 14,  $\zeta_4$  applies Cauchy-Schwarz inequality, and  $\zeta_5$  uses Eq. (12).

In view of Eq. (17), we have  $\frac{|T \cup T_E|}{|T_C \cup T_E|} \leq 2$ . Continuing Eq. (18), we obtain

$$\begin{aligned} \ell_\tau(w; \hat{T}_C \cup \hat{T}_E) &\leq \frac{1}{|T_C \cup T_E|} \sum_{x \in T \cup T_E} q(x) \ell(w; x, y_x) + 2\xi + \sqrt{2K_1} \xi \cdot \frac{z}{\tau} \\ &= \frac{\sum_{x \in T \cup T_E} q(x)}{|T_C \cup T_E|} \sum_{x \in T \cup T_E} p(x) \ell(w; x, y_x) + 2\xi + \sqrt{2K_1} \xi \cdot \frac{z}{\tau} \\ &= \ell_\tau(w; p \circ \hat{T}) + \left( \frac{\sum_{x \in T \cup T_E} q(x)}{|T_C \cup T_E|} - 1 \right) \sum_{x \in T \cup T_E} p(x) \ell(w; x, y_x) + 2\xi + \sqrt{2K_1} \xi \cdot \frac{z}{\tau} \\ &\leq \ell_\tau(w; p \circ \hat{T}) + \left( \frac{|T \cup T_E|}{|T_C \cup T_E|} - 1 \right) \sum_{x \in T \cup T_E} p(x) \ell(w; x, y_x) + 2\xi + \sqrt{2K_1} \xi \cdot \frac{z}{\tau} \\ &\leq \ell_\tau(w; p \circ \hat{T}) + 2\xi \sum_{x \in T \cup T_E} p(x) \ell(w; x, y_x) + 2\xi + \sqrt{2K_1} \xi \cdot \frac{z}{\tau}, \end{aligned} \tag{19}$$

where in the last inequality we use the fact that  $|T_E| = |T_D|$  and  $T \cap T_E = \emptyset$ , and thus

$$\frac{|T \cup T_E|}{|T_C \cup T_E|} - 1 = \frac{|T| + |T_D|}{|T|} - 1 = \frac{|T_D|}{|T|} \leq \xi.$$

On the other hand, we have the following result which will be proved later on.

**Claim 19.**  $\sum_{x \in T \cup T_E} p(x) \ell(w; x, y_x) \leq 1 + \sqrt{2K_2} \cdot \frac{z}{\tau}$ .

Therefore, continuing Eq. (19) we have

$$\ell_\tau(w; \hat{T}_C \cup \hat{T}_E) \leq \ell_\tau(w; p \circ \hat{T}) + 2\xi \left( 2 + \sqrt{2K_2} \cdot \frac{z}{\tau} \right) + \sqrt{2K_2} \xi \cdot \frac{z}{\tau}$$

which proves the first inequality of the proposition.

**Step 2.** We move on to prove the second inequality of the theorem, i.e. using  $\ell_\tau(w; \hat{T}_C \cup \hat{T}_E)$  to upper bound  $\ell_\tau(w; p \circ \hat{T})$ . Let us denote by  $p_D = \sum_{x \in T_D} p(x)$  the probability mass on dirty instances. Then

$$p_D = \frac{\sum_{x \in T_D} q(x)}{\sum_{x \in T} q(x)} \leq \frac{|T_D|}{(1 - \xi)|T|} \leq \frac{\xi}{1 - \xi} \leq 2\xi, \tag{20}$$

where the first inequality follows from  $q(x) \leq 1$  and Part 2 of Theorem 14, the second inequality follows from (13), and the last inequality is by our choice  $\xi \leq 1/2$ .

Note that by Part 2 of Theorem 14 and the choice  $\xi \leq 1/2$ , we have

$$\sum_{x \in T} q(x) \geq (1 - \xi)|T| \geq |T|/2$$

Hence

$$\begin{aligned}
 \sum_{x \in T} p(x)(w \cdot x)^2 &= \frac{1}{\sum_{x \in T} q(x)} \sum_{x \in T} q(x)(w \cdot x)^2 \\
 &\leq \frac{2}{|T|} \sum_{x \in T} q(x)(w \cdot x)^2 \\
 &\leq 2 \cdot K_2 z^2
 \end{aligned} \tag{21}$$

where the last inequality holds because of (14). Thus,

$$\begin{aligned}
 \sum_{x \in T_D} p(x)\ell(w; x, y_x) &\leq \sum_{x \in T_D} p(x) \left( 1 + \frac{|w \cdot x|}{\tau} \right) \\
 &= p_D + \frac{1}{\tau} \sum_{x \in T_D} p(x)|w \cdot x| \\
 &= p_D + \frac{1}{\tau} \sum_{x \in T} \left( \mathbf{1}_{\{x \in T_D\}} \sqrt{p(x)} \right) \cdot \left( \sqrt{p(x)} |w \cdot x| \right) \\
 &\leq p_D + \frac{1}{\tau} \sqrt{\sum_{x \in T} \mathbf{1}_{\{x \in T_D\}} p(x)} \cdot \sqrt{\sum_{x \in T} p(x)(w \cdot x)^2} \\
 &\stackrel{(21)}{\leq} p_D + \sqrt{p_D} \cdot \sqrt{2K_2} \cdot \frac{z}{\tau}.
 \end{aligned}$$

With the result on hand, we bound  $\ell_\tau(w; p \circ \hat{T})$  as follows:

$$\begin{aligned}
 \ell_\tau(w; p \circ \hat{T}) &= \sum_{x \in T_C \cup T_E} p(x)\ell(w; x, y_x) + \sum_{x \in T_D} p(x)\ell(w; x, y_x) \\
 &\leq \sum_{x \in T_C \cup T_E} \ell(w; x, y_x) + \sum_{x \in T_D} p(x)\ell(w; x, y_x) \\
 &= \ell_\tau(w; \hat{T}_C \cup \hat{T}_E) + \sum_{x \in T_D} p(x)\ell(w; x, y_x) \\
 &\leq \ell_\tau(w; \hat{T}_C \cup \hat{T}_E) + p_D + \sqrt{p_D} \cdot \sqrt{2K_2} \cdot \frac{z}{\tau} \\
 &\stackrel{(20)}{\leq} \ell_\tau(w; \hat{T}_C \cup \hat{T}_E) + 2\xi + \sqrt{4K_2\xi} \cdot \frac{z}{\tau},
 \end{aligned}$$

which proves the second inequality of the proposition.

This completes the proof.  $\square$

*Proof of Claim 19.* Since  $\ell(w; x, y_x) \leq 1 + \frac{|w \cdot x|}{\tau}$ , it follows that

$$\begin{aligned}
 \sum_{x \in T \cup T_E} p(x)\ell(w; x, y_x) &\leq \sum_{x \in T \cup T_E} p(x) \left( 1 + \frac{|w \cdot x|}{\tau} \right) \\
 &= 1 + \frac{1}{\tau} \sum_{x \in T \cup T_E} p(x)|w \cdot x| \\
 &\leq 1 + \frac{1}{\tau} \sqrt{\sum_{x \in T \cup T_E} p(x)(w \cdot x)^2} \\
 &\stackrel{(21)}{\leq} 1 + \sqrt{2K_2} \cdot \frac{z}{\tau},
 \end{aligned}$$

which completes the proof of Claim 19.  $\square$



### C.6. Proof of Lemma 16

For any phase  $k$ , let  $L_{\tau_k}(w) = \mathbb{E}_{x \sim D_{w_{k-1}, b_k}} [\ell_{\tau_k}(w; x, \text{sign}(w^* \cdot x))]$ .

*Proof.* Proposition 35 of Shen & Zhang (2021) showed that if  $|T_C \cup T_E| \geq d \cdot \text{polylog}(d, \frac{1}{\delta}, \frac{1}{\delta})$ , then by Rademacher complexity of the hinge loss we have that with probability  $1 - \frac{\delta}{2}$

$$\sup_{w \in W} \left| \ell_{\tau}(w; \hat{T}_C \cup \hat{T}_E) - \mathbb{E}_{x \sim D_{u, b}} [\ell_{\tau}(w; x, \text{sign}(w^* \cdot x))] \right| \leq \kappa. \quad (22)$$

Combining the above with Proposition 15 gives that with probability  $1 - \delta$ ,

$$\sup_{w \in W} \left| \ell_{\tau}(w; p \circ \hat{T}) - \mathbb{E}_{x \sim D_{u, b}} [\ell_{\tau}(w; x, \text{sign}(w^* \cdot x))] \right| \leq 2\kappa.$$

Namely, in any phase  $k \leq K$ , if  $|T_C \cup T_E| \geq d \cdot \text{polylog}(d, \frac{1}{\delta_k}, \frac{1}{\delta_k})$ , then with probability  $1 - \delta_k$ ,

$$\sup_{w \in W_k} \left| \ell_{\tau_k}(w; p) - L_{\tau_k}(w) \right| \leq 2\kappa. \quad (23)$$

On the other hand, since the (rescaled) hinge loss is always an upper bound of the error rate, we have

$$\text{err}_{D_{w_{k-1}, b_k}}(v_k) \leq L_k(v_k) \stackrel{\zeta_1}{\leq} \ell_{\tau_k}(v_k; p) + 2\kappa \stackrel{\zeta_2}{\leq} \min_{w \in W_k} \ell_{\tau_k}(w; p) + 3\kappa \leq \ell_{\tau_k}(w^*; p) + 3\kappa \stackrel{\zeta_3}{\leq} L_k(w^*) + 5\kappa \stackrel{\zeta_4}{\leq} 6\kappa \leq 8\kappa,$$

where we use the fact that  $v_k \in W_k$  in  $\zeta_1$ , use the optimality condition of  $v_k$  in  $\zeta_2$ , use  $w^* \in W_k$  in  $\zeta_3$ , and use Lemma 20 in  $\zeta_4$ .  $\square$

**Lemma 20** (Lemma 3.7 in Awasthi et al. (2017)). *Suppose Assumption 1 is satisfied. Then*

$$L_{\tau_k}(w^*) \leq \frac{\tau_k}{c_0 \min\{b_k, 1/9\}}.$$

*In particular, by our choice of  $\tau_k$ , it holds that*

$$L_{\tau_k}(w^*) \leq \kappa.$$

**Lemma 21.** *For any  $1 \leq k \leq K$ , if  $w^* \in W_k$ , then with probability  $1 - \delta_k$ ,  $\theta(v_k, w^*) \leq 2^{-k-8}\pi$ .*

*Proof.* For  $k = 1$ , by Lemma 16 with the facts that we actually sample from  $D$  and  $w^* \in \mathbb{R}^d =: W_1$ , we immediately have

$$\Pr_{x \sim D} (\text{sign}(v_1 \cdot x) \neq \text{sign}(w^* \cdot x)) \leq 8\kappa.$$

Hence Part 4 of Lemma 24 indicates that

$$\theta(v_1, w^*) \leq 8c_2\kappa = 16c_2\kappa \cdot 2^{-1}. \quad (24)$$

Now we consider  $2 \leq k \leq K$ . Denote  $X_k = \{x : |w_{k-1} \cdot x| \leq b_k\}$ , and  $\bar{X}_k = \{x : |w_{k-1} \cdot x| > b_k\}$ . We will show that the error of  $v_k$  on both  $X_k$  and  $\bar{X}_k$  is small, hence  $v_k$  is a good approximation to  $w^*$ .

First, we consider the error on  $X_k$ , which is given by

$$\begin{aligned} & \Pr_{x \sim D} (\text{sign}(v_k \cdot x) \neq \text{sign}(w^* \cdot x), x \in X_k) \\ &= \Pr_{x \sim D} (\text{sign}(v_k \cdot x) \neq \text{sign}(w^* \cdot x) \mid x \in X_k) \cdot \Pr_{x \sim D}(x \in X_k) \\ &= \text{err}_{D_{w_{k-1}, b_k}}(v_k) \cdot \Pr_{x \sim D}(x \in X_k) \\ &\leq 8\kappa \cdot 2b_k = 16\kappa b_k, \end{aligned} \quad (25)$$

where the inequality is due to Lemma 16 and Lemma 24. Note that the inequality holds with probability  $1 - \delta_k$  in view of Lemma 16.

Next we derive the error on  $\bar{X}_k$ . Note that Lemma 10 of Zhang (2018) states for any unit vector  $u$ , and any general vector  $v$ ,  $\theta(v, u) \leq \pi \|v - u\|_2$ . Hence,

$$\theta(v_k, w^*) \leq \pi \|v_k - w^*\|_2 \leq \pi(\|v_k - w_{k-1}\|_2 + \|w^* - w_{k-1}\|_2) \leq 2\pi r_k,$$

where we use the condition that both  $v_k$  and  $w^*$  are in  $W_k$ .

Recall that we set  $r_k = 2^{-k-6} < 1/4$  in our algorithm and choose  $b_k = \bar{c} \cdot r_k$  where  $\bar{c} \geq 8\pi/c_4$ , which allows us to apply Lemma 25 and obtain

$$\begin{aligned} \Pr_{x \sim D} (\text{sign}(v_k \cdot x) \neq \text{sign}(w^* \cdot x), x \notin X_k) &\leq c_3 \cdot 2\pi r_k \cdot \exp\left(-\frac{c_4 \bar{c} \cdot r_k}{2 \cdot 2\pi r_k}\right) \\ &= 2^{-k} \cdot \frac{c_3 \pi}{4} \exp\left(-\frac{c_4 \bar{c}}{4\pi}\right). \end{aligned}$$

This in allusion to (25) gives

$$\text{err}_D(v_k) \leq 16\kappa \cdot \bar{c} \cdot r_k + 2^{-k} \cdot \frac{c_3 \pi}{4} \exp\left(-\frac{c_4 \bar{c}}{4\pi}\right) = \left(2\kappa \bar{c} + \frac{c_3 \pi}{4} \exp\left(-\frac{c_4 \bar{c}}{4\pi}\right)\right) \cdot 2^{-k}.$$

Recall that we set  $\kappa = \exp(-\bar{c})$ . For convenience denote by  $f(\bar{c})$  the coefficient of  $2^{-k}$  in the above expression. By Part 4 of Lemma 24

$$\theta(v_k, w^*) \leq c_2 \text{err}_D(v_k) \leq c_2 f(\bar{c}) \cdot 2^{-k}. \quad (26)$$

Now let  $g(\bar{c}) = c_2 f(\bar{c}) + 16c_2 \exp(-\bar{c})$ . By our choice of  $\bar{c}$ ,  $g(\bar{c}) \leq 2^{-8}\pi$ . This ensures that for both (24) and (26),  $\theta(v_k, w^*) \leq 2^{-k-8}\pi$  for any  $k \geq 1$ .  $\square$

**Lemma 22.** For any  $1 \leq k \leq K$ , if  $\theta(v_k, w^*) \leq 2^{-k-8}\pi$ , then  $w^* \in W_{k+1}$ .

*Proof.* We only need to show that  $\|w_k - w^*\|_2 \leq r_{k+1}$ . Let  $\hat{v}_k = v_k / \|v_k\|_2$ . By algebra  $\|\hat{v}_k - w^*\|_2 = 2 \sin \frac{\theta(v_k, w^*)}{2} \leq \theta(v_k, w^*) \leq 2^{-k-8}\pi \leq 2^{-k-6}$ . Now we have

$$\|w_k - w^*\|_2 = \|\hat{v}_k - w^*\|_2 \leq 2^{-k-6} = r_{k+1}.$$

The proof is complete.  $\square$

## C.7. Proof of Theorem 2

*Proof.* We will prove the theorem with the following claim.

**Claim 23.** For any  $1 \leq k \leq K$ , with probability at least  $1 - \sum_{i=1}^k \delta_i$ ,  $w^*$  is in  $W_{k+1}$ .

Based on the claim, we immediately have that with probability at least  $1 - \sum_{k=1}^K \delta_k \geq 1 - \delta$ ,  $w^*$  is in  $W_{K+1}$ . By our construction of  $W_{K+1}$ , we have

$$\|w^* - w_K\|_2 \leq 2^{-K-5}.$$

This, together with Part 4 of Lemma 24 and the fact that  $\theta(w^*, w_K) \leq \pi \|w^* - w_K\|_2$  (see Lemma 10 of Zhang (2018)), implies

$$\text{err}_D(w_K) \leq \frac{\pi}{c_1} \cdot 2^{-K-5} = \epsilon.$$

The sample complexity of the algorithm is given by

$$N := \sum_{k=1}^K N_k = \sum_{k=1}^K \frac{d}{b_k} \cdot \text{polylog}\left(d, \frac{1}{b_k}, \frac{1}{\delta_k}\right) \leq \frac{d}{\epsilon} \cdot \text{polylog}\left(d, \frac{1}{\epsilon}, \frac{1}{\delta}\right),$$

where we use the fact that  $b_k \geq K_1 \epsilon$  for some constant  $K_1 > 0$  and  $K = O(\log \frac{1}{\epsilon})$ .

For each phase  $k \leq K$ , the number of calls to  $\text{EX}^y$  equals the size of  $T$ . For the size of  $T_C$ , by Lemma 24 we know that the probability mass of the band  $X_k = \{x : |w_{k-1} \cdot x| \leq b_k\}$  is at most  $2b_k$ , implying that  $|T_C| \leq O(b_k N_k)$  with high probability in view of Chernoff bound. On the other hand, by Part 2 of Lemma 12 we have  $|T_D| = |T_E| \leq O(b_k N_k)$  since  $\xi_k = \Theta(1)$  as indicated in Section 3.1.1. Therefore,  $|T| \leq O(b_k N_k)$  and the label complexity  $m$  of the algorithm is given by

$$m \leq \sum_{k=1}^K b_k N_k = d \cdot \text{polylog} \left( d, \frac{1}{\epsilon}, \frac{1}{\delta} \right).$$

It remains to prove Claim 23 by induction. First, for  $k = 1$ ,  $W_1 = \{w : \|w\|_2 \leq 1\}$ . Therefore,  $w^* \in W_1$  with probability 1. Now suppose that Claim 23 holds for some  $k \geq 2$ , that is, there is an event  $E_{k-1}$  that happens with probability  $1 - \sum_{i=1}^{k-1} \delta_i$ , and on this event  $w^* \in W_k$ . By Lemma 21 we know that there is an event  $F_k$  that happens with probability  $1 - \delta_k$ , on which  $\theta(v_k, w^*) \leq 2^{-k-8}\pi$ . This further implies that  $w^* \in W_{k+1}$  in view of Lemma 22. Therefore, consider the event  $E_{k-1} \cap F_k$ , on which  $w^* \in W_{k+1}$  with probability  $\Pr(E_{k-1}) \cdot \Pr(F_k | E_{k-1}) = (1 - \sum_{i=1}^{k-1} \delta_i)(1 - \delta_k) \geq 1 - \sum_{i=1}^k \delta_i$ .  $\square$

## D. Properties of Isotropic Log-Concave Distributions

We record some useful properties of isotropic log-concave distributions.

**Lemma 24.** *There are absolute constants  $c_0, c_1, c_2 > 0$ , such that the following holds for all isotropic log-concave distributions  $D \in \mathcal{D}$ . Let  $f_D$  be the density function. We have*

1. *Orthogonal projections of  $D$  onto subspaces of  $\mathbb{R}^d$  are isotropic log-concave;*
2. *If  $d = 1$ , then  $\Pr_{x \sim D}(a \leq x \leq b) \leq |b - a|$ ;*
3. *If  $d = 1$ , then  $f_D(x) \geq c_0$  for all  $x \in [-1/9, 1/9]$ ;*
4. *For any two vectors  $u, v \in \mathbb{R}^d$ ,*

$$c_1 \cdot \Pr_{x \sim D}(\text{sign}(u \cdot x) \neq \text{sign}(v \cdot x)) \leq \theta(u, v) \leq c_2 \cdot \Pr_{x \sim D}(\text{sign}(u \cdot x) \neq \text{sign}(v \cdot x));$$

5.  *$\Pr_{x \sim D}(\|x\|_2 \geq t\sqrt{d}) \leq \exp(-t + 1)$ .*

We remark that Parts 1, 2, 3, and 5 are due to Lovász & Vempala (2007), and Part 4 is from Vempala (2010); Balcan & Long (2013).

The following lemma is implied by the proof of Theorem 21 of Balcan & Long (2013), which shows that if we choose a proper band width  $b > 0$ , the error outside the band will be small. This observation is crucial for controlling the error over the distribution  $D$ , and has been broadly recognized in the literature (Awasthi et al., 2017; Zhang, 2018).

**Lemma 25** (Theorem 21 of Balcan & Long (2013)). *There are absolute constants  $c_3, c_4 > 0$  such that the following holds for all isotropic log-concave distributions  $D \in \mathcal{D}$ . Let  $u$  and  $v$  be two unit vectors in  $\mathbb{R}^d$  and assume that  $\theta(u, v) = \alpha < \pi/2$ . Then for any  $b \geq \frac{4}{c_4}\alpha$ , we have*

$$\Pr_{x \sim D}(\text{sign}(u \cdot x) \neq \text{sign}(v \cdot x) \text{ and } |v \cdot x| \geq b) \leq c_3 \alpha \exp\left(-\frac{c_4 b}{2\alpha}\right).$$

**Lemma 26.** *Suppose  $x$  is randomly drawn from  $D_{u,b}$ . Then with probability  $1 - \delta$ ,  $\|x\|_2 \leq c_7 \sqrt{d} \log \frac{1}{\delta}$  for some constant  $c_7 > 0$ .*

*Proof.* Using Part 2 of Lemma 27, we have

$$\Pr_{x \sim D_{u,b}}(\|x\|_2 \geq \alpha) \leq \frac{1}{c_8 b} \Pr_{x \sim D}(\|x\|_2 \geq \alpha) \leq \frac{e}{c_8 b} \exp(-\alpha/\sqrt{d}),$$

where we applied Part 5 of Lemma 24 in the last inequality. The lemma follows by setting the right-hand side to  $\delta$ .  $\square$

**Lemma 27.** Let  $c_8 = \min \left\{ 2c_0, \frac{2c_0}{9C_1}, \frac{1}{C_1} \right\}$ . Then for all isotropic log-concave distributions  $D \in \mathcal{D}$ ,

1.  $\Pr_{x \sim D} (|u \cdot x| \leq b) \geq c_8 \cdot b$ ;
2.  $\Pr_{x \sim D_{u,b}}(E) \leq \frac{1}{c_8 b} \Pr_{x \sim D}(E)$  for any event  $E$ .

*Proof.* We first consider the case that  $u$  is a unit vector.

For the lower bound, Part 3 of Lemma 24 shows that the density function of the random variable  $u \cdot x$  is lower bounded by  $c_0$  when  $|u \cdot x| \leq 1/9$ . Thus

$$\Pr_{x \sim D} (|u \cdot x| \leq b) \geq \Pr_{x \sim D} (|u \cdot x| \leq \min\{b, 1/9\}) \geq 2c_0 \min\{b, 1/9\} \geq 2c_0 \min \left\{ 1, \frac{1}{9C_1} \right\} \cdot b$$

where in the last inequality we use the condition  $b \leq C_1$ .

For any event  $E$ , we always have

$$\Pr_{x \sim D_{u,b}}(E) \leq \frac{\Pr_{x \sim D}(E)}{\Pr_{x \sim D}(|u \cdot x| \leq b)} \leq \frac{1}{c_8 b} \Pr_{x \sim D}(E).$$

Now we consider the case that  $u$  is the zero vector and  $b = C_1$ . Then  $\Pr_{x \sim D} (|u \cdot x| \leq b) = 1 \geq c_8 \cdot b$  in view of the choice  $c_8$ . Thus Part 2 still follows. The proof is complete.  $\square$
